# Supplementary material for: Activation of the GABA-alpha receptor by berberine rescues retinal ganglion cells to attenuate experimental diabetic retinopathy
Source: Front Mol Neurosci. 2022 Aug 9;15:930599. doi: 10.3389/fnmol.2022.930599 (PMC9396352; doi:10.3389/fnmol.2022.930599)
Supplement: Supplementary file 4 [file Data_Sheet_3.XLSX]

## Sheet: Weight & BG
	Weight(g)						Blood glucose level(mmol/L)
Number	Baseline		8w			Number	Baseline		8w
	Nondiabetic	Diabetic	Nondiabetic	Diabetic			Nondiabetic	Diabetic	Nondiabetic	Diabetic
1	249	256	575	220		1	5.3	5.8	6.7	33.3
2	234	245	550	205		2	5.6	5.1	7.3	30.8
3	240	249	481	256		3	5.9	4.8	5.4	15.9
4	242	245	479	215		4	5.8	5.4	6.1	30.2
5	233	232	536	200		5	7.9	6.1	6.7	33.3
6	230	249	512	225		6	5.6	5.4	7.8	33.3
7	235	250	489	234		7	5.7	7.2	9.9	31.3
8	233	217	542	249		8	5.6	4.8	6.8	29.2
9	228	227	451	198		9	5.8	3.8	8.3	29.4
10	221	225	468	186		10	5.7	5.1	7.9	33.3
