# Supplementary material for: Activation of the GABA-alpha receptor by berberine rescues retinal ganglion cells to attenuate experimental diabetic retinopathy
Source: Front Mol Neurosci. 2022 Aug 9;15:930599. doi: 10.3389/fnmol.2022.930599 (PMC9396352; doi:10.3389/fnmol.2022.930599)
Supplement: Supplementary file 5 [file Data_Sheet_4.XLSX]

## Sheet: phNR
	Nondiabetic	Diabetic	Diabetic + BBR	Diabetic + BBR + SR95531
1	48.95	15.77	21.93	10.3
2	35.74	2.829	35.82	10.13
3	28.83	13.83	43.14	10.28
4	28.11	12.54	23.38	7.223
5	41.19	9.055	25.89	16.21
6	27.43	10.26	36.4	12.91
7	26.38	7.434	18.57	5.148
8	23.3	10.22	27.2	9.352

## Sheet: OP
	Nondiabetic	Diabetic	Diabetic + BBR	Diabetic + BBR + SR95531
1	36.04	21.7	28.03	25.16
2	42.66	23.99	24.77	19.86
3	31.99	20.59	32.14	14.56
4	38.76	19.79	27.34	21.02
5	36.72	12.7	34.36	14.71
6	31.06		44.44

## Sheet: ERG
	Nondiabetic				Diabetic				Diabetic + BBR				Diabetic + BBR + SR95531
	1	2	3	4	1	2	3	4	1	2	3	4	1	2	3	4
a-wave	-124.4	-153.5	-142.7	-138.8	-60.58	-105.7	-120.4	-94.89	-121.3	-158.8	-142.1	-136.3	-55.63	-48	-85.33	-73.08
b-wave	338.6	378.6	264.2	367	114.4	200.5	251.1	186.7	357.8	358.9	289.9	387.2	148.3	117.3	138.7	251.4
