# Supplementary material for: Activation of the GABA-alpha receptor by berberine rescues retinal ganglion cells to attenuate experimental diabetic retinopathy
Source: Front Mol Neurosci. 2022 Aug 9;15:930599. doi: 10.3389/fnmol.2022.930599 (PMC9396352; doi:10.3389/fnmol.2022.930599)
Supplement: Supplementary file 6 [file Data_Sheet_5.XLSX]

## Sheet: OGTT
	Nondiabetic					Diabetic				Diabetic + BBR				Diabetic + BBR + SR95531
	1	2	3	4	5	1	2	3	4	1	2	3	4	1	2	3	4
30 min	12.3	11	14	16.9	22.8	33.3	33.3	33.3	33.3	33.3	33.3	16.7	27	33.3	18.5	16.9	20.2
1 hr	10.1	9.3	11.8	11.1	11.5	33.3	33.3	33.3	33.3	33.3	33.3	19.4	28	33.3	22.1	33.3	26.3
2 hr	8.4	8.7	12	8.7	9.3	23.4	27.3	29.3	25.1	30.2	33.3	15.9	28.4	28.2	13.4	31.5	31.4
3 hr	5.7	5.6	6.7	6.4	6.3	25.3	25.5	24.6	24.4	27.9	24.7	8.7	11.7	25.8	5.7	19.4	22.8

## Sheet: Weight
	Nondiabetic										Diabetic										Diabetic + BBR										Diabetic + BBR + SR95531
Baseline	249	234	240	242	233	230	235	233	228	221	245	249	240	245	232	249	250	217	227	225	240	233	230	224	239	231	216	223	229	236	225	238	236	233	235	240	220
2w	377	347	368	318	340	309	316	308	303	313	234	197	218	224	265	227					383	256	257	318	223	247	260	253	373	403	229	259	252	322	312	245
4w	442	469	400	497	502	452	440	435	497	432	223	224	184	222							397	285	260	309	288	246	440	435	368	308	257	300	346	270	369	259
6w	521	496	447	533			520	530	521	496	209		212	221							420	300	245	333	218	337	309	239	353	281	341	287	278	260	292	387	275
8w	575	550	481	536	512	489	626	542	575	550	205	256	215	220	200	187	234	217	198	186	408	307	262	297	230	310	285	254	263	387	314	301	273	233.5	314	405	273

## Sheet: Blood Glucose
	Nondiabetic				Diabetic				Diabetic + BBR				Diabetic + BBR + SR95531
Baseline	5.3	5.6	5.9	5.8	5.8	5.1	4.8	5.4	5.7	4.9	5.3	5.6	5.1	5.4	6.1
2w	7	6.1	5.4	5.7	24.7	20.4	27.8	26.3	25.4	28.3	17.6	23.9	18.9	20.8	16.7
4w	6.3	4.7	6.2	5.9	23.9	25	24.6	20.8	24.2	31.3	21.9	26.4	15.9	30.1	25.9
6w	5.2	7.6	7.4	6.2	33.3	33.1	26.2	18.3	23.8	32.1	16.7	28.2	23.5	33.1	20.8
8w	6.7	7.3	5.4	6.1	33.3	30.8	26.1	22.9	19.3	22.8	28.6	18.4	18.7	22.1	23.8
