# Supplementary material for: Activation of the GABA-alpha receptor by berberine rescues retinal ganglion cells to attenuate experimental diabetic retinopathy
Source: Front Mol Neurosci. 2022 Aug 9;15:930599. doi: 10.3389/fnmol.2022.930599 (PMC9396352; doi:10.3389/fnmol.2022.930599)
Supplement: Supplementary file 7 [file Data_Sheet_6.XLSX]

## Sheet: FluoroGold-labeled RGCs
	Nondiabetic					Diabetic					Diabetic + BBR					Diabetic + BBR + SR95531
	1	2	3	4	5	1	2	3	4	5	1	2	3	4	5	1	2	3	4	5
Central	2356	2931	3533	2452	2875	1271	883	1278	965	1481	2127	2017	1987	2217	2061	1777	945	1683	1374	1681
Peripheral	1397	1194	1466	1187	1521	1038	599	799	677	1013	1545	1068	921	1207	1076	828	679	1079	776	974
